1 **Title page**

2

3 **Climatic Factors in Relation to Diarrhea for Informed Public Health Decision-Making: A**  
4 **Novel Methodological Approach**

5

6 Takayoshi Ikeda PhD<sup>1</sup>, Thandi Kapwata MSc<sup>2</sup>, Swadhin K. Behera PhD<sup>1</sup>, Noboru Minakawa  
7 PhD<sup>3</sup>, Masahiro Hashizume PhD<sup>3</sup>, Neville Sweijd PhD<sup>4</sup>, Angela Mathee PhD<sup>2,5,6</sup> and Caradee  
8 Yael Wright PhD<sup>7,8</sup>

9

10 <sup>1</sup>Japan Agency for Marine-Earth Science and Technology, Yokohama Institute for Earth  
11 Sciences, Kanazawa-ku, Yokohama, Japan

12 <sup>2</sup>Environment and Health Research Unit, South African Medical Research Council,  
13 Johannesburg, South Africa

14 <sup>3</sup> Institute of Tropical Medicine, Nagasaki University, Nagasaki, Japan

15 <sup>4</sup>Applied Centre for Climate and Earth Systems Science, National Research Foundation, Cape  
16 Town, South Africa

17 <sup>5</sup>Environmental Health Department, Faculty of Health Sciences, University of Johannesburg,  
18 South Africa

19 <sup>6</sup>Department of Health Sciences, University of the Witwatersrand, Johannesburg, South Africa

20 <sup>7</sup>Environment and Health Research Unit, South African Medical Research Council, Pretoria,  
21 South Africa

22 <sup>8</sup>Department of Geography, Geoinformatics and Meteorology, University of Pretoria, Pretoria,  
23 South Africa

24

25 Contact author: Caradee Y. Wright, Environment and Health Research Unit, South African  
26 Medical Research Council, Private Bag x385, 0001, Pretoria, South Africa. Tel: +27 12 339  
27 85434. Email: [caradee.wright@mrc.ac.za](mailto:caradee.wright@mrc.ac.za)

28

29

30

31

32 **Abstract**

33 Background: Diarrheal disease is one of the leading causes of morbidity and mortality globally,  
34 particularly in children under 5 years of age. Factors related to diarrheal disease incidence  
35 include infection, malnutrition, and exposure to contaminated water and food. Climate factors  
36 also contribute to diarrheal disease.

37 Objectives: We aimed to explore the relationship between temperature, precipitation and diarrhea  
38 case counts of hospital admissions among vulnerable communities living in a rural setting in  
39 South Africa.

40 Methods: We applied a novel approach of ‘contour analysis’ to visually examine simultaneous  
41 observations in frequencies of anomalously high and low diarrhea case counts occurring in a  
42 season and assigning colors to differences that were statistically significant based on chi-squared  
43 test results.

44 Results: There was a significantly positive difference between high and low ‘groups’ when there  
45 was a lack of rain (0 mm of cumulative rain) for 1 to 2 weeks in winter for children under 5.

46 Diarrhea prevalence was greater among children under 5 years when conditions were hotter than  
47 usual during winter and spring.

48 Discussion: Dry conditions may lead to increased water storage raising the risks of water  
49 contamination. Reduced use of water for personal hygiene and cleaning of outdoor pit latrines  
50 affect sanitation quality. Rural communities require adequate and uninterrupted water provision  
51 and healthcare providers should raise awareness about potential diarrheal risks especially during  
52 the dry season.

53

54 **Keywords:** diarrheal disease, climate change, hygiene, temperature, South Africa, environmental  
55 health.

56

57

## 58 **Introduction**

59 An estimated 3.4 million people die from diarrheal and other water-related diseases each year  
60 [1]. Diarrheal disease is responsible globally for 21% of deaths per year in children younger  
61 than 5 years of age [2] and is ranked as the third leading cause of death in this age group in South  
62 Africa [3]. The transmission of diarrheal disease is determined by factors related to, among  
63 others, weather variables, the vector and agent, socio-economic and ecological conditions, and  
64 intrinsic human immunity [4].

65 Several infectious water-borne diseases, including diarrheal disease, are linked to  
66 fluctuations in weather and climate [5] and usually exhibit typical seasonal patterns in which the  
67 role of temperature and rainfall has been documented [6] but not always in agreement. Both  
68 floods and droughts can increase the risk of diarrheal diseases, although the evidence for the  
69 effects of drought on diarrhea is inconclusive [7]. Major causes of diarrhea, i.e. cholera,  
70 cryptosporidium, *E. coli* infection, giardia, shigella, typhoid, and viruses such as hepatitis A, are  
71 associated with heavy rainfall and contaminated water supplies [8]. In the tropics, diarrheal  
72 diseases typically peak during the rainy season. A significant association of non-cholera diarrhea  
73 related hospital visits was found with high and low rainfall and with high temperature in Dhaka,  
74 Bangladesh [9]. In Senegal, there were two annual peaks in diarrheal incidence: one during the  
75 cold dry season and one during the rainy season. Thiam et al. [10] observed a positive  
76 association of diarrheal incidence with high average temperature of 36 °C and above, and high  
77 cumulative monthly rainfall at 57 mm and above. In Vietnam, considerable spatial heterogeneity  
78 existed in the risk of all-cause for diarrhoea across districts investigated with low elevation and  
79 differential responses to flooding and air temperature, and humidity drove further spatial  
80 heterogeneity in diarrheal disease risk [11]. In Ecuador, heavy rainfall events were associated  
81 with increased diarrhoea incidence following dry periods and decreased diarrhoea incidence  
82 following wet periods [12].

83 Children and especially children under 5 years of age, are particularly susceptible to  
84 diarrheal disease. In a study using Demographic and Health Survey data from 14 Sub-Saharan  
85 countries, regional prevalence of diarrhoea in children under three years of age was considered in  
86 relation to variations in precipitation and temperature [13]. Results showed that shortage of  
87 rainfall in the dry season increased the prevalence of diarrhoea across Sub-Saharan Africa. Such  
88 shortages occur in many regions when rainfall is average to below-average relative to the long-

89 term monthly-mean. The results also showed that an increase in monthly-average maximum  
90 temperature raises the prevalence of diarrhoea while an increase in monthly minimum  
91 temperature reduces the number of diarrheal cases [13]. Maximum temperature and extreme  
92 rainfall days were also reported as strongly related to diarrhoea-associated morbidity with the  
93 impact of maximum temperature on diarrhoea-associated morbidity appearing primarily among  
94 children (0–14 years) and older adults (40–64 years), but with relatively less effects on adults  
95 (15–39 years) [14].

96 Since diarrheal disease is a major cause of morbidity and mortality, particularly among  
97 children under 5 years of age in developing countries and given that climate change-related  
98 health consequences of diarrheal diseases are projected to pose significant risks to future  
99 populations [15] we set out to explore the relationship between climate factors (temperature and  
100 precipitation) and diarrhoea prevalence among vulnerable rural communities in South Africa  
101 located in a subtropical setting, using a novel approach. In this study, we used “contours” to  
102 visualize frequencies of diarrhoea anomalies occurring in a season and assigned colors to  
103 differences that were statistically significant based on chi-squared test results. Meteorologists  
104 and oceanographers apply this technique called ‘contour analysis’ to visually explain  
105 simultaneous observations [16]. Isopleths, or lines of equal value, are used in contour analysis to  
106 link places of equal parameter. The use of “contours” or “contour plots” is seen in climate-  
107 related research, for instance, to consider weather patterns [17]. To the best of our knowledge,  
108 this is the first-time contour analysis has been used in climate-based-health research for public  
109 health decision-making. The results may be useful for integration into early warning systems that  
110 use climate and other relevant information towards prevention of diarrhoea.

111

## 112 **Methods**

### 113 *Data*

114 Handwritten hospital admission records for 1 January 2002 to 31 December 2016 were collected  
115 from two large, public hospitals, namely Nkhensani Hospital and Maphutha L. Malatjie Hospital,  
116 located in Mopani District Municipality in Limpopo Province, South Africa (Figure 1). Hospital  
117 records were scanned using an SV 600 overhead snap scanner, pages were saved as soft copies  
118 as .pdf files and later printed for double data entry into an electronic database using EpiData  
119 (version 3.1). Each hospital admission record included patient’s name and surname, patient’s

120 residential address, patient's date of birth, patient's age, date of admission and reason for  
121 admission.

122 All diarrhea cases were extracted from the hospital admission records database for cases  
123 defined as diarrhoea using the criteria and terms provided by a South African medical doctor.  
124 Abdominal distention was not included since it could be associated with a variety of medical  
125 conditions other than diarrhoea. Data were unavailable in 2006 for both hospitals as well as at  
126 one hospital for weeks 1-23 in 2002 and weeks 1-40 in 2007. Despite the missing data mentioned  
127 above, our analyses could still be applied with the missing values (we did not replace missing  
128 values with zero) since we focused on anomalously high and low counts of daily admissions. It  
129 should be emphasized that the count for total admissions is not necessarily the total admissions at  
130 that hospital for that day / month / year but rather a total of the admissions that were captured by  
131 the hospital staff, collected by the researchers and entered by the data enterers. Cases of  
132 diarrhoea were summed as counts per week and diarrhoea weekly case counts were used in the  
133 contour analysis, described below.

134 Daily precipitation and temperature data were obtained from the South African Weather  
135 Service monitoring stations in the same District Municipality in which the two public hospitals  
136 were located. Table 1 presents the mean weekly precipitation and temperature by season for  
137 2002 to 2016 for the study site. Precipitation data were available from one station in the District  
138 Municipality. Daily precipitation levels (mm) were summed to generate a weekly rainfall value.  
139 For temperature, data from 8 stations (namely Hoedspruit Air force Base, Tzaneen-Westfalia  
140 Estate, Levubu, Giyani, Tshivhasie Tea Venda, Tshanowa Primary School, Mukumbani Tea  
141 Estate and Punda Maria) at longitudes between 30.1 and 31.1° E and latitudes between 22.6 and  
142 24.3° S in the District Municipality were extracted and applied in the study. Data from all these  
143 stations were used to calculate a spatially-averaged temperature for the study area. Daily  
144 minimum and maximum temperature (°C) values were then temporally averaged to generate  
145 weekly temperature values for minimum (Tmin) and maximum (Tmax) temperatures. For the  
146 contour analysis, weekly rainfall, Tmin and Tmax were used.

147

#### 148 *Contour analysis*

149 As an initial step for the analysis, we compared the climate variables, namely temperature and  
150 precipitation, between high and low diarrhea case count anomalies from hospital admissions,

151 which were calculated by removing the climatological mean and linear trend of the case counts.  
152 The original time series was decomposed into three components: (i) Seasonal patterns that  
153 repeated with a fixed period of time (defined according to season as stated below) considered on  
154 a monthly scale and deemed as the climatological means; (ii) The underlying trend which could  
155 relate to the effort of collecting diarrhea data, the effect of some intervention or population  
156 growth, etc.; and (iii) The residuals of the original time series after the seasonal and trend series  
157 were removed referring to the “noise”, “irregular” or “remainder”, which is thus termed as the  
158 random component, i.e. the anomalies. Anomalies were therefore calculated according to  
159 Equation 1:

$$160 \quad A(t) = X(t) - S(t) - T(t) \quad [1]$$

161 Where: A is the Anomaly, S is the seasonal component, T is the trend component, and t is time  
162 (or week). High weekly anomalies were inferred as ‘higher than normal’ diarrhea case counts  
163 and low anomalies were inferred as ‘lower than normal’, where ‘normal’ refers to the long-term  
164 average for the corresponding period/week i.e. the first component discussed above. In addition,  
165 we discarded anomalies that were less than one standard deviation from the mean to retain  
166 anomalously extreme high or low incidence. Then we segregated the high and low incidence  
167 (case count anomalies) by season. Seasons were defined as spring: September-October-  
168 November (abbreviated as SON); summer: December-January-February (DJF); autumn: March-  
169 April-May (MAM); and winter: June-July-August (JJA).

170 For all weeks within each season, across the data set, we counted for precipitation how  
171 many times it rained on average ‘y’ mm over ‘x’ consecutive weeks (with x going from 1 to 10  
172 weeks, and y for decile increments of the range of precipitation values) and tested these findings  
173 for statistically significant differences between the two groups of incidence category (i.e. high or  
174 low). The differences of how many times it rained in the high and low groups were plotted as  
175 contour lines. Differences with statistical significance, based on a chi-squared test for counts and  
176 using a Monte Carlo test [18] with 1 000 replicates to compute p-values at alpha level 0.01, were  
177 plotted. We repeated this approach for consecutive weeks with weekly Tmax and Tmin. For both  
178 precipitation and temperature, we also looked at lagged effects of each climate variable, for 0 to  
179 8 weeks lag (chosen *a priori*) [9, 19], i.e. lag 3 means "temperature or rain 3 weeks prior to  
180 diarrhea counts of a certain week". Contour plots were made for individuals of 5 years and older

181 and for children under 5 years of age (i.e. 0 to 4 years), separately. All analyses were done in R  
182 version 3.2.2 [20]

183

#### 184 *Ethics Statement*

185 Permission to conduct the study was granted by the Limpopo Department of Health (REF 4/2/2),  
186 the management staff of Nkhensani Hospital and Maphutha L. Malatjie Hospital. Permission was  
187 granted by the South African Weather Service for use of the climate data. The South African  
188 Medical Research Council Research Ethics Committee approved the study protocol (EC005-  
189 3/2014).

190

### 191 **Results**

#### 192 *Hospital admission counts*

193 Between 2002 and 2016 (inclusive) the total numbers (as captured for this study) of diarrhea  
194 hospital admission case counts at the two hospitals for individuals aged 5 years and older and for  
195 children under 5 years of age, separately, were 8 885 and 2 343, respectively. Figure 2 shows the  
196 high and low weekly diarrhea case count anomalies during the 14-year period for (a) individuals  
197 aged 5 years and older and (b) children under 5 years of age.

198

#### 199 *Precipitation and diarrhea case counts for individuals 5 years and older*

200 We applied ‘contour analysis’ to the anomalously high and low weekly diarrhea count groups for  
201 individuals aged 5 years and older and compared these groups by counting consecutive weekly  
202 total rainfall. Figure 3 shows significant positive differences for different lags for JJA (dry  
203 season). At lags of 2, 3 and 6 weeks, cumulative rain of 8 – 14 mm for 6 to 10 consecutive weeks  
204 showed positive differences between high and low groups (orange colors). In the beginning of  
205 the rainy season SON, significant differences were seen in cumulative rain of up to 14 mm for 10  
206 consecutive weeks for up to 2 weeks lag (Figure 4). In the rainy season (DJF), cumulative rain of  
207 40 - 52 mm for 8 to 9 consecutive weeks showed significant differences between high and low  
208 groups up to 1-week lag (Supplementary Figure S1). Similar levels of cumulative rain were seen  
209 in MAM, however, for lags of 5 to 8 weeks (Figure S2).

210

#### 211 *Precipitation and diarrhea case counts for children under 5 years of age*

212 For children under 5 years of age, significant differences between the high and low groups  
213 showed different patterns in all seasons compared to the older age group. The most remarkable  
214 difference - evident by the 'red cells' in Figure 5 for most lags - indicated that there was a  
215 significantly positive difference when there was a lack of rain (0 mm of cumulative rain) for 1 to  
216 2 weeks in JJA. Also, 5 or more consecutive weeks of 7 to 21 mm of cumulative rain showed  
217 significantly positive differences at most lags. For SON, significant differences were seen most  
218 noticeably at a lag of 5 weeks with 4 to 9 weeks of consecutively no rain (Figure 6). Significant  
219 differences were not seen in DJF (Figure S3) and MAM showed differences only at 4 and 8 for 8  
220 to 10 weeks of consecutive cumulative rain of 14 – 26 mm (Figure S4).

221

#### 222 *Temperature and diarrhea case counts for individuals aged 5 years and older*

223 There were no statistically significant associations between temperature (Tmin and Tmax) and  
224 high and low anomalies in case counts of diarrhea among individuals aged 5 years and older  
225 (Data not shown).

226

#### 227 *Temperature and diarrhea case counts for children under 5 years of age*

228 Among children under 5 years of age, there were some differences of Tmin and Tmax between  
229 the high and low groups for seasons JJA and SON. For JJA, 1 week of Tmin at 12 °C at 2 to 3  
230 weeks lag and 16 °C at 8 weeks lag showed significant positive differences between high and  
231 low groups (Figure S5). For Tmax, 1 to 2 weeks of consecutive temperatures reaching 24 °C  
232 showed positive differences between the two groups at 3 to 4 weeks lag (Figure S6). As for  
233 SON, 9 to 10 weeks of consecutive Tmax of 26 °C showed positive significant differences at 5-,  
234 7- and 8-weeks lag (Figure S7). Seasons DJF and MAM did not show any significant  
235 differences.

236

## 237 **Discussion**

238 We set out to explore the relationship between precipitation / temperature and case counts of  
239 diarrhea hospital admissions using a novel approach of 'contour analysis' to visually explain  
240 simultaneous statistically significant observations in frequencies of anomalously high and low  
241 diarrhea case counts occurring in a season. Previous studies have used alternate statistical  
242 methods of analysis, such as time series regression [21,22] to consider the relationship between



243 precipitation and diarrhea, and temperature and diarrhea. In those studies, the datasets were  
244 significantly larger in size compared to the data available in our study and there were fewer  
245 missing data probably because of electronic record-keeping which is not common practice in  
246 rural, African hospitals and clinics. We successfully implemented contour analysis for the first  
247 time with meteorological and public health data. This method of analysis is therefore of great  
248 potential value for use with relatively small- and medium-sized datasets and where the hospital  
249 admissions data are constrained due to missing information - partially because of data being  
250 handwritten and not electronically captured. In time series analysis, for example, the approach  
251 would be to either remove all data prior to the complete year of missing data (in our study this  
252 was the year 2006) or use data imputation. In our analyses, we did not need to remove the data  
253 because our analysis was not affected by such missing data, instead, we treated missing values as  
254 missing (not zeroes) and focused on the anomalously high and low diarrhea counts.

255 Our most statistically significant findings were for children under 5 years of age in whom  
256 we saw a high prevalence of diarrhea when conditions were either wetter than average during the  
257 rainy season or drier than average during the dry season, as well as when temperatures were  
258 higher than normal. Children may be particularly vulnerable to diarrhea transmission when  
259 conditions are very dry and hot. A similar finding was seen in Nigeria where rotavirus was also  
260 most prevalent (95 % of all cases) during the dry season [23]. Similarly, in Botswana, diarrhea  
261 incidence is high in both the wet and dry seasons, but it was unexpectedly highest in the dry  
262 season with a 20 % increase over the yearly mean [24]. In the latter study, the authors  
263 hypothesized that the dry (and hot) conditions encouraged the activity and density of flies that  
264 transmitted diarrhea-causing microorganisms. We surmise that in Limpopo, South Africa, the  
265 warmer and drier conditions may lead to water shortages, lower availability of safe water sources  
266 [25] and increased water storage (perhaps not hygienically maintained), reducing personal use  
267 (and cleaning) of outdoor pit latrines, thereby reducing sanitation quality and personal hygiene.  
268 In addition, the wetter conditions may lead to increased risks of water contamination. Under-  
269 developed infrastructure and illegal connections to water supply pipes may also lead to  
270 contaminated water [26]. It is possible that children under the age of 5 are more vulnerable to  
271 such conditions. However, these assumptions remained to be verified among the communities  
272 served by the two hospitals from which data were drawn for use in the analyses presented here.

273           Based on the contour analysis results and associations found at certain lags, these results  
274 could assist healthcare practitioners to issue seasonal warnings of potentially high diarrhea and  
275 prevention measures in advance. For instance, separate warnings could be issued based on the  
276 contour analysis for individuals older than 5 years and for children under 5. For the younger age  
277 group, a warning could be issued for the winter season, up to 3 weeks in advance with up to 2  
278 consecutive weeks of no rain. This warning can be updated on a weekly basis if there is still no  
279 rain occurring in the coming weeks. Most importantly, the warning would still be in effect if  
280 there is anomalous rain (7-21 mm) during the last 10 weeks prior to the winter season. Children  
281 under 5 were also susceptible to changes in temperature. For instance, when minimum  
282 temperature reaches 12 to 16 ° C, which is warmer than average for the winter season, it could  
283 also result in higher cases of diarrhea in the children under 5 years of age. It could be that wet  
284 and warmer conditions than average during winter co-vary and therefore anomalous winter rain  
285 may lead to warmer temperatures for that season and therefore increase diarrhea prevalence.

286           Our study was constrained by the quantity and quality of the hospital admissions data that  
287 were used to determine diarrhea prevalence. The medical records included those from the  
288 children, female and male wards only. All the records were handwritten and posed numerous  
289 challenges such as faded ink and handwriting being illegible, daily use of books leading to torn  
290 pages and errors in recording, for example, a male patient captured in a female ward.  
291 Misdiagnosis and misclassification were also evident in the hospital records, for example, where  
292 there was no clear indication of the final diagnosis of health outcome when a patient was  
293 discharged and where dates were entered incorrectly (the discharge date was sometimes captured  
294 as being before the admission date). While it would have been informative to know the cause of  
295 each diarrhea case, this information was not available from the hospitals, however, it is possible  
296 that the dry, cold season diarrhea was of viral cause [27]. In almost all cases the sex was missing.  
297 Therefore, it was not possible to use these data in our analyses. Despite those hurdles, the results  
298 presented here are statistically significant and missing and incorrect reporting are unlikely to  
299 drastically change the conclusions.

300           In summary, using a novel approach of analysis we detected trends in patterns of  
301 precipitation and temperature in relation to diarrhea prevalence for two separate age groups.  
302 Children under 5 years of age were especially vulnerable to diarrhea during very dry, hot  
303 conditions as well as when conditions were wetter than usual. We noted that local living,

304 environmental and environmental health conditions may ‘overwhelm’ the typical climate-disease  
305 patterns known to influence diarrheal disease. Dry conditions lead to changes in water  
306 availability, use and storage and likely increase in the risk of diarrhea transmission in rural  
307 settings, whereas wet conditions lead to water contamination. Rural communities require  
308 adequate and uninterrupted water provision all-year round. Healthcare practitioners should help  
309 to raise awareness about potential diarrheal risks especially during the dry season. In addition to  
310 understanding climate-diarrhea patterns localized to specific settings and conveyed through early  
311 warning systems, a significant proportion of diarrheal disease can be prevented through safe  
312 drinking water and adequate sanitation and personal and food hygiene [1] which should remain a  
313 priority especially in rural settings. Finally, there is an opportunity to use contour analysis in  
314 public health and other sectors to improve planning and responses to, not only diarrhea, but other  
315 infectious diseases.

316

#### 317 Acknowledgements

318

319 This research was carried out for the iDEWS (infectious Diseases Early-Warning  
320 System) project supported by SATREPS (Science and Technology Research Partnership for  
321 Sustainable Development) Program of JICA (JAPAN International Cooperation Agency)/AMED  
322 (Japan Agency for Medical Research and Development) in Japan and the ACCESS (Applied  
323 Centre for Climate and Earth Systems Science) program of NRF (National Research Foundation)  
324 and DST (Department of Science and Technology in South Africa). Zamantimande Kunene,  
325 Mirriam Mogotsi and Wellington Siziba are acknowledged for collecting hospital data. We thank  
326 the hospital management and staff for permitting the study and for accommodating our team  
327 during the collection periods. We acknowledge the South African Weather Service for provision  
328 of the temperature and precipitation data.

329

#### 330 **Conflict of Interest**

331

332 The authors declare they have no actual or potential conflicting interests.

333

334

## 335 **References**

- 336 1. WHO. 2017 Diarrheal Disease Key facts. [http://www.who.int/news-room/fact-](http://www.who.int/news-room/fact-sheets/detail/diarrhoeal-disease)  
337 [sheets/detail/diarrhoeal-disease](http://www.who.int/news-room/fact-sheets/detail/diarrhoeal-disease) [accessed 8 October 2018].
- 338 2.Kosek M, Bern C, Guerrant RL. 2003. The global burden of diarrheal disease, as estimated  
339 from studies published between 1992 and 2000. *Bulletin of the WHO* 81:197-204, PMID:  
340 12764516.
- 341 3.Awoniton OF, Pillay-van Wky V, Dhansay A, Day C, Bradshaw D. 2016. Diarrhoea in  
342 children under five years of age in South Africa (1997-2014). *Trop Med & Internat Health*  
343 21:1060-1070, PMID: 27314457, <https://doi.org/10.1111/tmi.12739>.
- 344 4.McMichael AJ, Woodruff RE, Hales S. 2007. Climate change and human health: present and  
345 future risks. *The Lancet* 367:859-869, [https://doi.org/10.1016/S0140-6736\(06\)68079-3](https://doi.org/10.1016/S0140-6736(06)68079-3).
- 346 5.Patz J, Campbell-Lendrum D, Holloway T, Foley JA. 2005. Impact of regional climate change  
347 on human health. *Nature* 438:310-317, <https://doi.org/10.1038/nature04188>.
- 348 6.Haines A, Kovats RS, Campbell-Mendrum D, Corvalan C. 2006. Climate change and human  
349 health: impacts, vulnerability and public health. *Public Health* 120:585-596, PMID: X, DOI.
- 350 7.Levy K, Woster AP, Goldstein RS, Carlton EJ. 2016. Untangling the impacts of climate change  
351 on waterborne diseases: a systematic review of relationships between diarrheal diseases and  
352 temperature, rainfall, flooding, and drought. *Environ Sci Technol* 50:4905-4922, PMID:  
353 27058059, <https://doi.org/10.1021/acs.est.5b06186>.
- 354 8.WHO. 2018.Climate change and human health – risks and responses summary  
355 <http://www.who.int/globalchange/summary/en/index4.html> [accessed 8 October 2018].
- 356 9.Hashizume M, Armstrong B, Hajat S, Wagatsuma Y, Faruque A, Hayashi T, Sack D. 2007.  
357 Association between climate variability and hospital visits for non-cholera diarrhea in  
358 Bangladesh: Effects and vulnerable groups. *Int J Epidemiol* 36:1030-1037,  
359 <https://doi.org/10.1093/ije/dym148>.
- 360 10.Thiam S, Diene AN, Sy I, Winkler MS, Schindler C, Ndione JA, et al. 2017. Association  
361 between childhood diarrheal incidence and climatic factors in urban and rural settings in the  
362 Health District of Mbour, Senegal. *Int J Env Res Public Health*14:1049, PMID: 28895927,  
363 <https://doi.org/10.3390/ijerph14091049>.
- 364 11.Thompson CN, Zelner JL, Nhu Tdo H, Phan MV, Hoang Le P, Nguyen Thanh H, et al. 2015.  
365 The impact of environmental and climatic variation on the spatiotemporal trends of

- 366 hospitalized pediatric diarrhoea in Ho Chi Minh City, Vietnam. *Health & Place* 35;147-154,  
367 PMID: 26402922, <https://doi.org/10.1016/j.healthplace.2015.08.001>.
- 368 12. Carlton EJ, Eisenberg JNS, Goldstick J, Cevallos W, Trostel J, Levy K. 2013. Heavy rainfall  
369 events and diarrhea incidence: the role of social and environmental factors. *Am J Epidemiol*  
370 179(3):344-352, PMID: 24256618, <https://doi.org/10.1093/aje/kwt279>.
- 371 13. Bandyopadhyay S, Kanji S, Wang L. 2012. The impact of rainfall and temperature variation  
372 on diarrheal prevalence in Sub-Saharan Africa. *Applied Geography* 33;63-72,  
373 <https://doi.org/10.1016/j.apgeog.2011.07.017>.
- 374 14. Chou WC, Wu JL, Wang YC, Huang H, Sung FC, Chuang CY. 2010. Modelling the impact  
375 of climate variability on diarrhea-associated diseases in Taiwan (1996-2007). *Sci Total*  
376 *Environ* 409:43-51, PMID: 20947136, <https://doi.org/10.1016/j.scitotenv.2010.09.001>.
- 377 15. Ebi KL. 2008. Adaptation costs for climate change-related cases of diarrheal disease,  
378 malnutrition, and malaria in 2030. *Globalization and Health* 4:9, [https://doi.org/](https://doi.org/10.1186/1744-8603-4-9)  
379 [10.1186/1744-8603-4-9](https://doi.org/10.1186/1744-8603-4-9).
- 380 16. University of Wisconsin-Madison. 1997. Contour Analysis.  
381 <http://cimss.ssec.wisc.edu/wxwise/contour/contour1.html> [accessed 8 October 2018].
- 382 17. Swales D, Alexander M, Hughes M. 2016. Examining moisture pathways and extreme  
383 precipitation in the U.S. Intermountain West using self-organizing maps. *Geophysical*  
384 *Research Letters* 43:1727-1735, <https://doi.org/10.1002/2015GL067478>.
- 385 18. Hope ACA. 1968. A simplified Monte Carlo significance test procedure. *J Royal Statistical*  
386 *Society Series B* 30;582-598, <https://doi.org/10.1080/03610918.2016.1208232>.
- 387 19. Carlton EJ, Woster AP, DeWitt P, Goldstein RS, Levy K. 2016. A systematic review and  
388 meta-analysis of ambient temperature and diarrheal diseases. *Int J Epidemiol* 45(1);117-130,  
389 PMID: 26567313, <https://doi.org/10.1093/ije/dyv296>.
- 390 20. R Core Team. 2016. R: A language and environment for statistical computing. R Foundation  
391 for Statistical Computing, Vienna, Austria. <https://www.R-project.org/> [accessed 8 October  
392 2018].
- 393 21. Purohit SG, Kelkar SD, Simha V. 1998. Time series analysis of patients with rotavirus  
394 diarrhoea in Pune, India. *J Diarrheal Dis Res* 16:74-83, PMID: 9805412

- 395 22. Imai C, Hashizume M. 2015. A Systematic review on methodology: time series regression  
396 analysis for environmental factors and infectious diseases. *Trop Med Health* 43(1):1-9,  
397 PMID: 25859149, <https://doi.org/10.2149/tmh.2014-21>.
- 398 23. Tagbo BN, Mwenda JM, Armah G, Obidike EO, Okafor UH, Oguonu T, Ozumba UC, et al.  
399 2014. Epidemiology of rotavirus diarrhoea among children younger than 5 years in Enugu,  
400 South East, Nigeria. *The Pediatric Infectious Disease Journal* 33:S19-S22, [https://doi.org/](https://doi.org/10.1097/INF.0000000000000047)  
401 [10.1097/INF.0000000000000047](https://doi.org/10.1097/INF.0000000000000047).
- 402 24. Alexander KA, Carzolio M, Goodin D, Vance E. 2013. Climate Change is Likely to Worsen  
403 the Public Health Threat of Diarrheal Disease in Botswana. *Int J Environ Res Public*  
404 *Health*10(4):1202-1230, PMID: 23531489, <https://doi.org/10.3390/ijerph10041202>.
- 405 25. Boithias L, Choisy M, Souliyaseng N, Jourden M, Quet F, Buisson Y et al. 2016.  
406 Hydrological Regime and Water Shortage as Drivers of the Seasonal Incidence of Diarrheal  
407 Diseases in a Tropical Montane Environment. *PLOS Neglected Tropical Diseases*  
408 10(12):e0005195, PMID: 27935960, <https://doi.org/10.1371/journal.pntd.0005195>.
- 409 26. Kapwata T, Mathee A, le Roux W, Wright CY. 2018. Diarrhoeal disease in relation to  
410 possible household risk factors in South African villages. *Int J Env Res Public Health*  
411 15:1665, PMID: 30082638, <https://doi.org/10.3390/ijerph15081665>.
- 412 27. Potgieter N, de Beer MC, Taylor MB, Steele AD. 2010. Prevalence and diversity of rotavirus  
413 strains in children with acute diarrhea from rural communities in the Limpopo Province,  
414 South Africa, from 1998 to 2000. *J Infect Dis* 202(Suppl S1):148-155, PMID: 20684695,  
415 <https://doi.org/10.1086/653561>.

416

417

419 **Table 1.** Mean and standard error of weekly precipitation and temperature by season for 2002 to  
420 2016 for the study site.

|                        | <b>Season</b> |            |            |            |
|------------------------|---------------|------------|------------|------------|
|                        | <b>JJA</b>    | <b>SON</b> | <b>DJF</b> | <b>MAM</b> |
| <b>Mean Tmax (° C)</b> | 24.0          | 28.7       | 29.7       | 26.9       |
| <b>Tmax SE</b>         | 0.2           | 0.2        | 0.2        | 0.2        |
| <b>Mean Tmin (° C)</b> | 11.1          | 16.2       | 19.3       | 15.6       |
| <b>Tmin SE</b>         | 0.1           | 0.1        | 0.1        | 0.2        |
| <b>Mean Prcp</b>       | 0.6           | 7.4        | 19.5       | 6.9        |
| <b>Prcp SE</b>         | 0.2           | 1.1        | 2.6        | 1.4        |

421

422

423 **Figure captions**

424 **Figure 1.** Location of the two hospitals in the study site in Limpopo Province, South Africa.

425

426 **Figure 2.** High and low weekly diarrhoea case count anomalies for (a) individuals aged 5 years  
427 and older and (b) children under 5 years of age between 2002 and 2016. Anomalies were  
428 normalized for comparison purposes.

429

430 **Figure 3.** Statistically significant contour differences in anomalously high and low diarrhoea  
431 case counts for lag 0 to 8 weeks per consecutive weeks of precipitation among individuals aged 5  
432 years and older for season JJA.

433

434 **Figure 4.** Statistically significant contour differences in anomalously high and low diarrhoea  
435 case counts for lag 0 to 8 weeks per consecutive weeks of precipitation among individuals aged 5  
436 years and older for season SON.

437

438 **Figure 5.** Statistically significant contour differences in anomalously high and low diarrhoea  
439 case counts for lag 0 to 8 weeks per consecutive weeks of precipitation among individuals under  
440 5 years of age for season JJA.

441

442 **Figure 6.** Statistically significant contour differences in anomalously high and low diarrhoea  
443 case counts for lag 0 to 8 weeks per consecutive weeks of precipitation among individuals under  
444 5 years of age for season SON.

445



bioRxiv preprint doi: <https://doi.org/10.1101/545046>; this version posted February 11, 2019. The copyright holder for this preprint (which was not certified by peer review) is the author/funder, who has granted bioRxiv a license to display the preprint in perpetuity. It is made available under aCC-BY 4.0 International license.

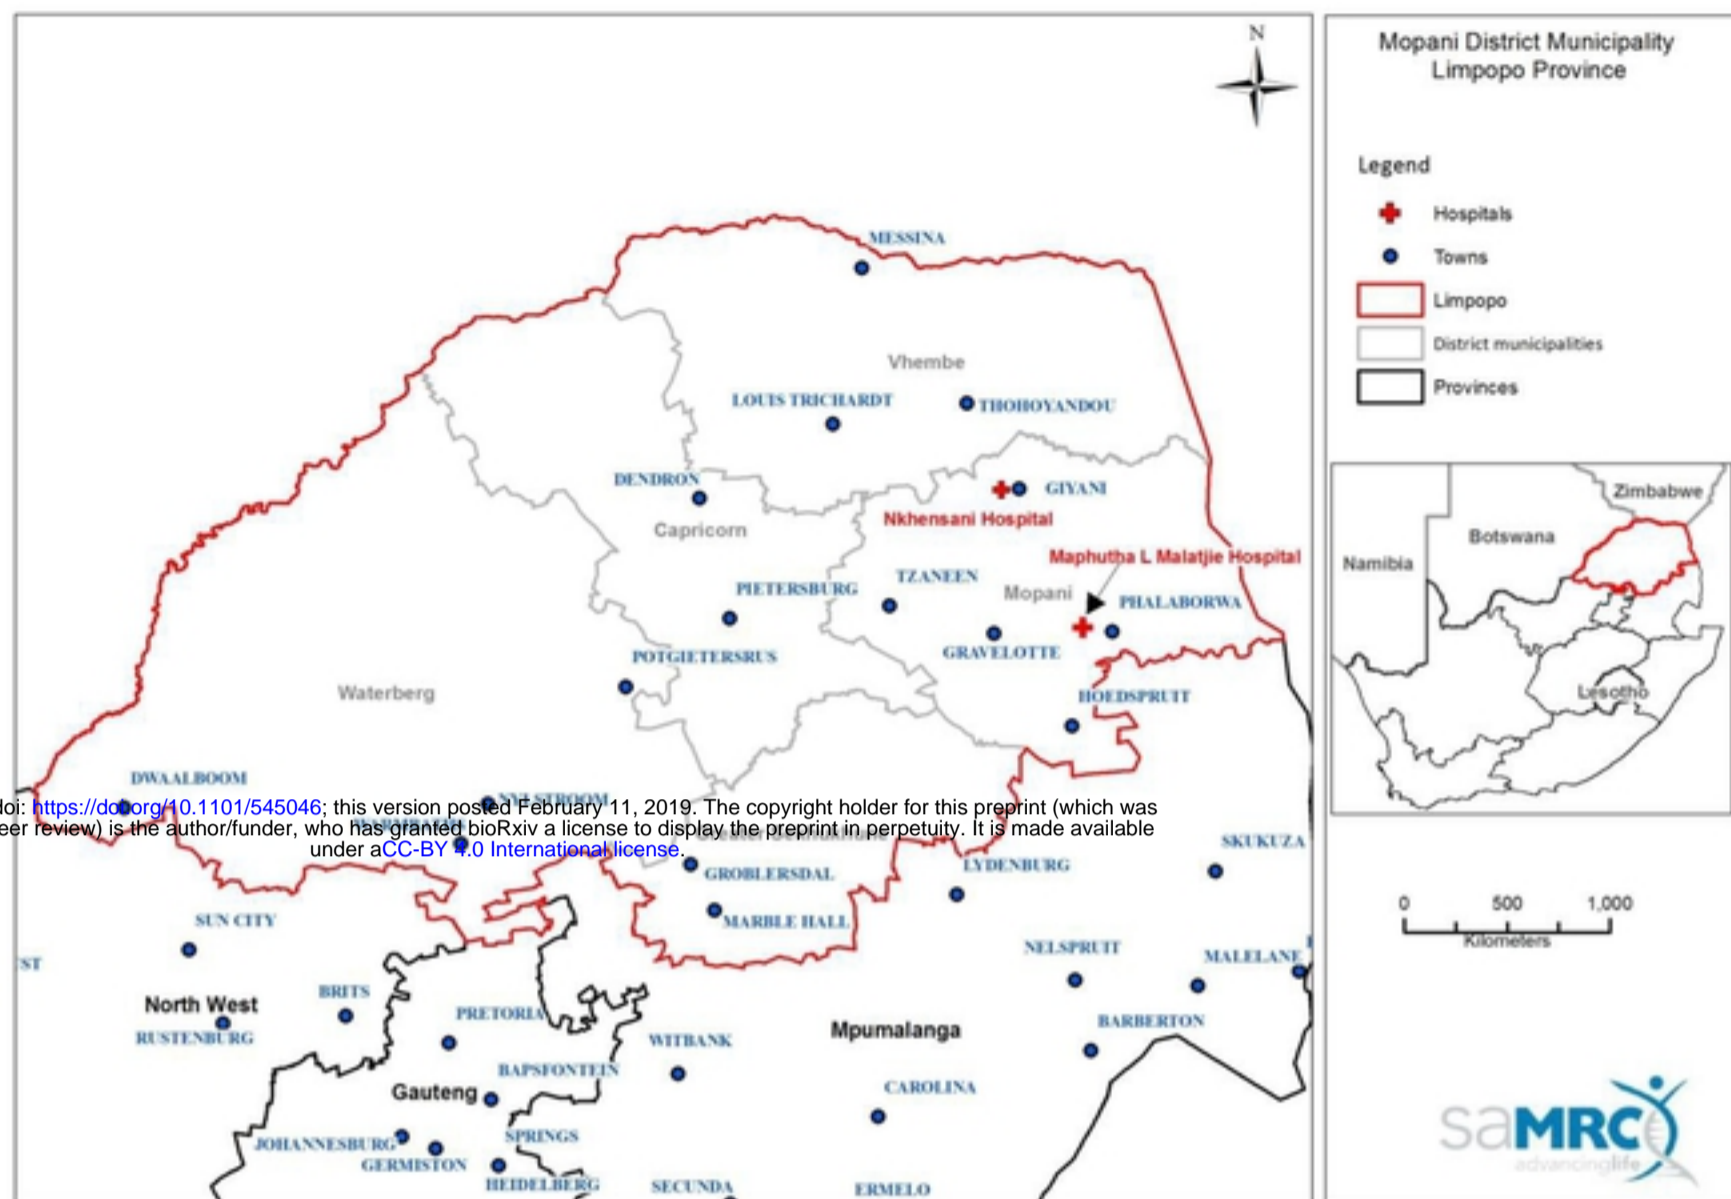

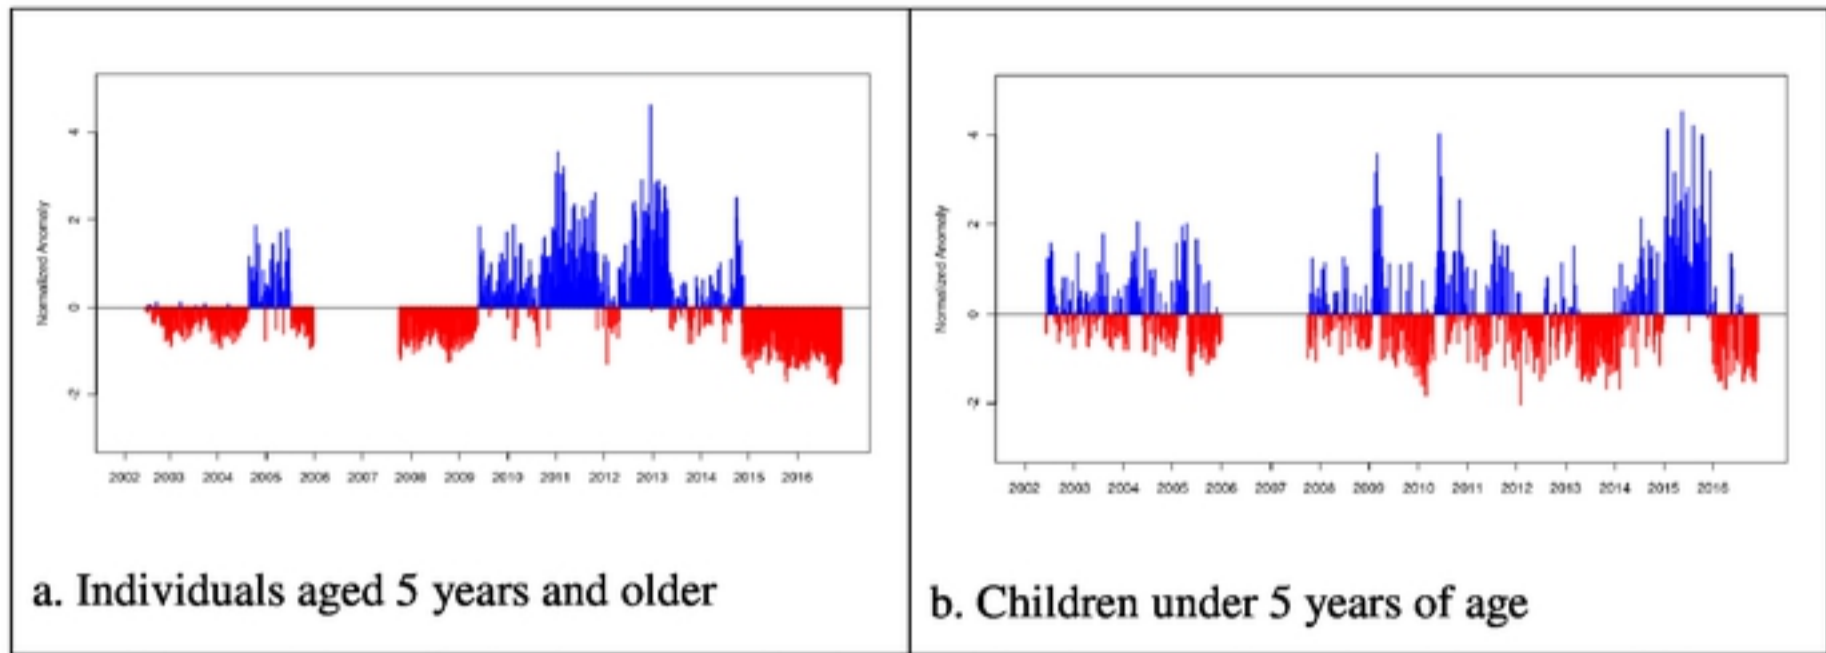

**Note.** The anomaly was obtained by removing the linear trend and seasonal climatology of the counts. Colors represent positive (blue) and negative (red) anomalies. Normalization entailed using the time series counts minus the mean of all counts then divided by the standard deviation.

bioRxiv preprint doi: <https://doi.org/10.1101/545046>; this version posted February 11, 2019. The copyright holder for this preprint (which was not certified by peer review) is the author/funder, who has granted bioRxiv a license to display the preprint in perpetuity. It is made available under aCC-BY 4.0 International license.

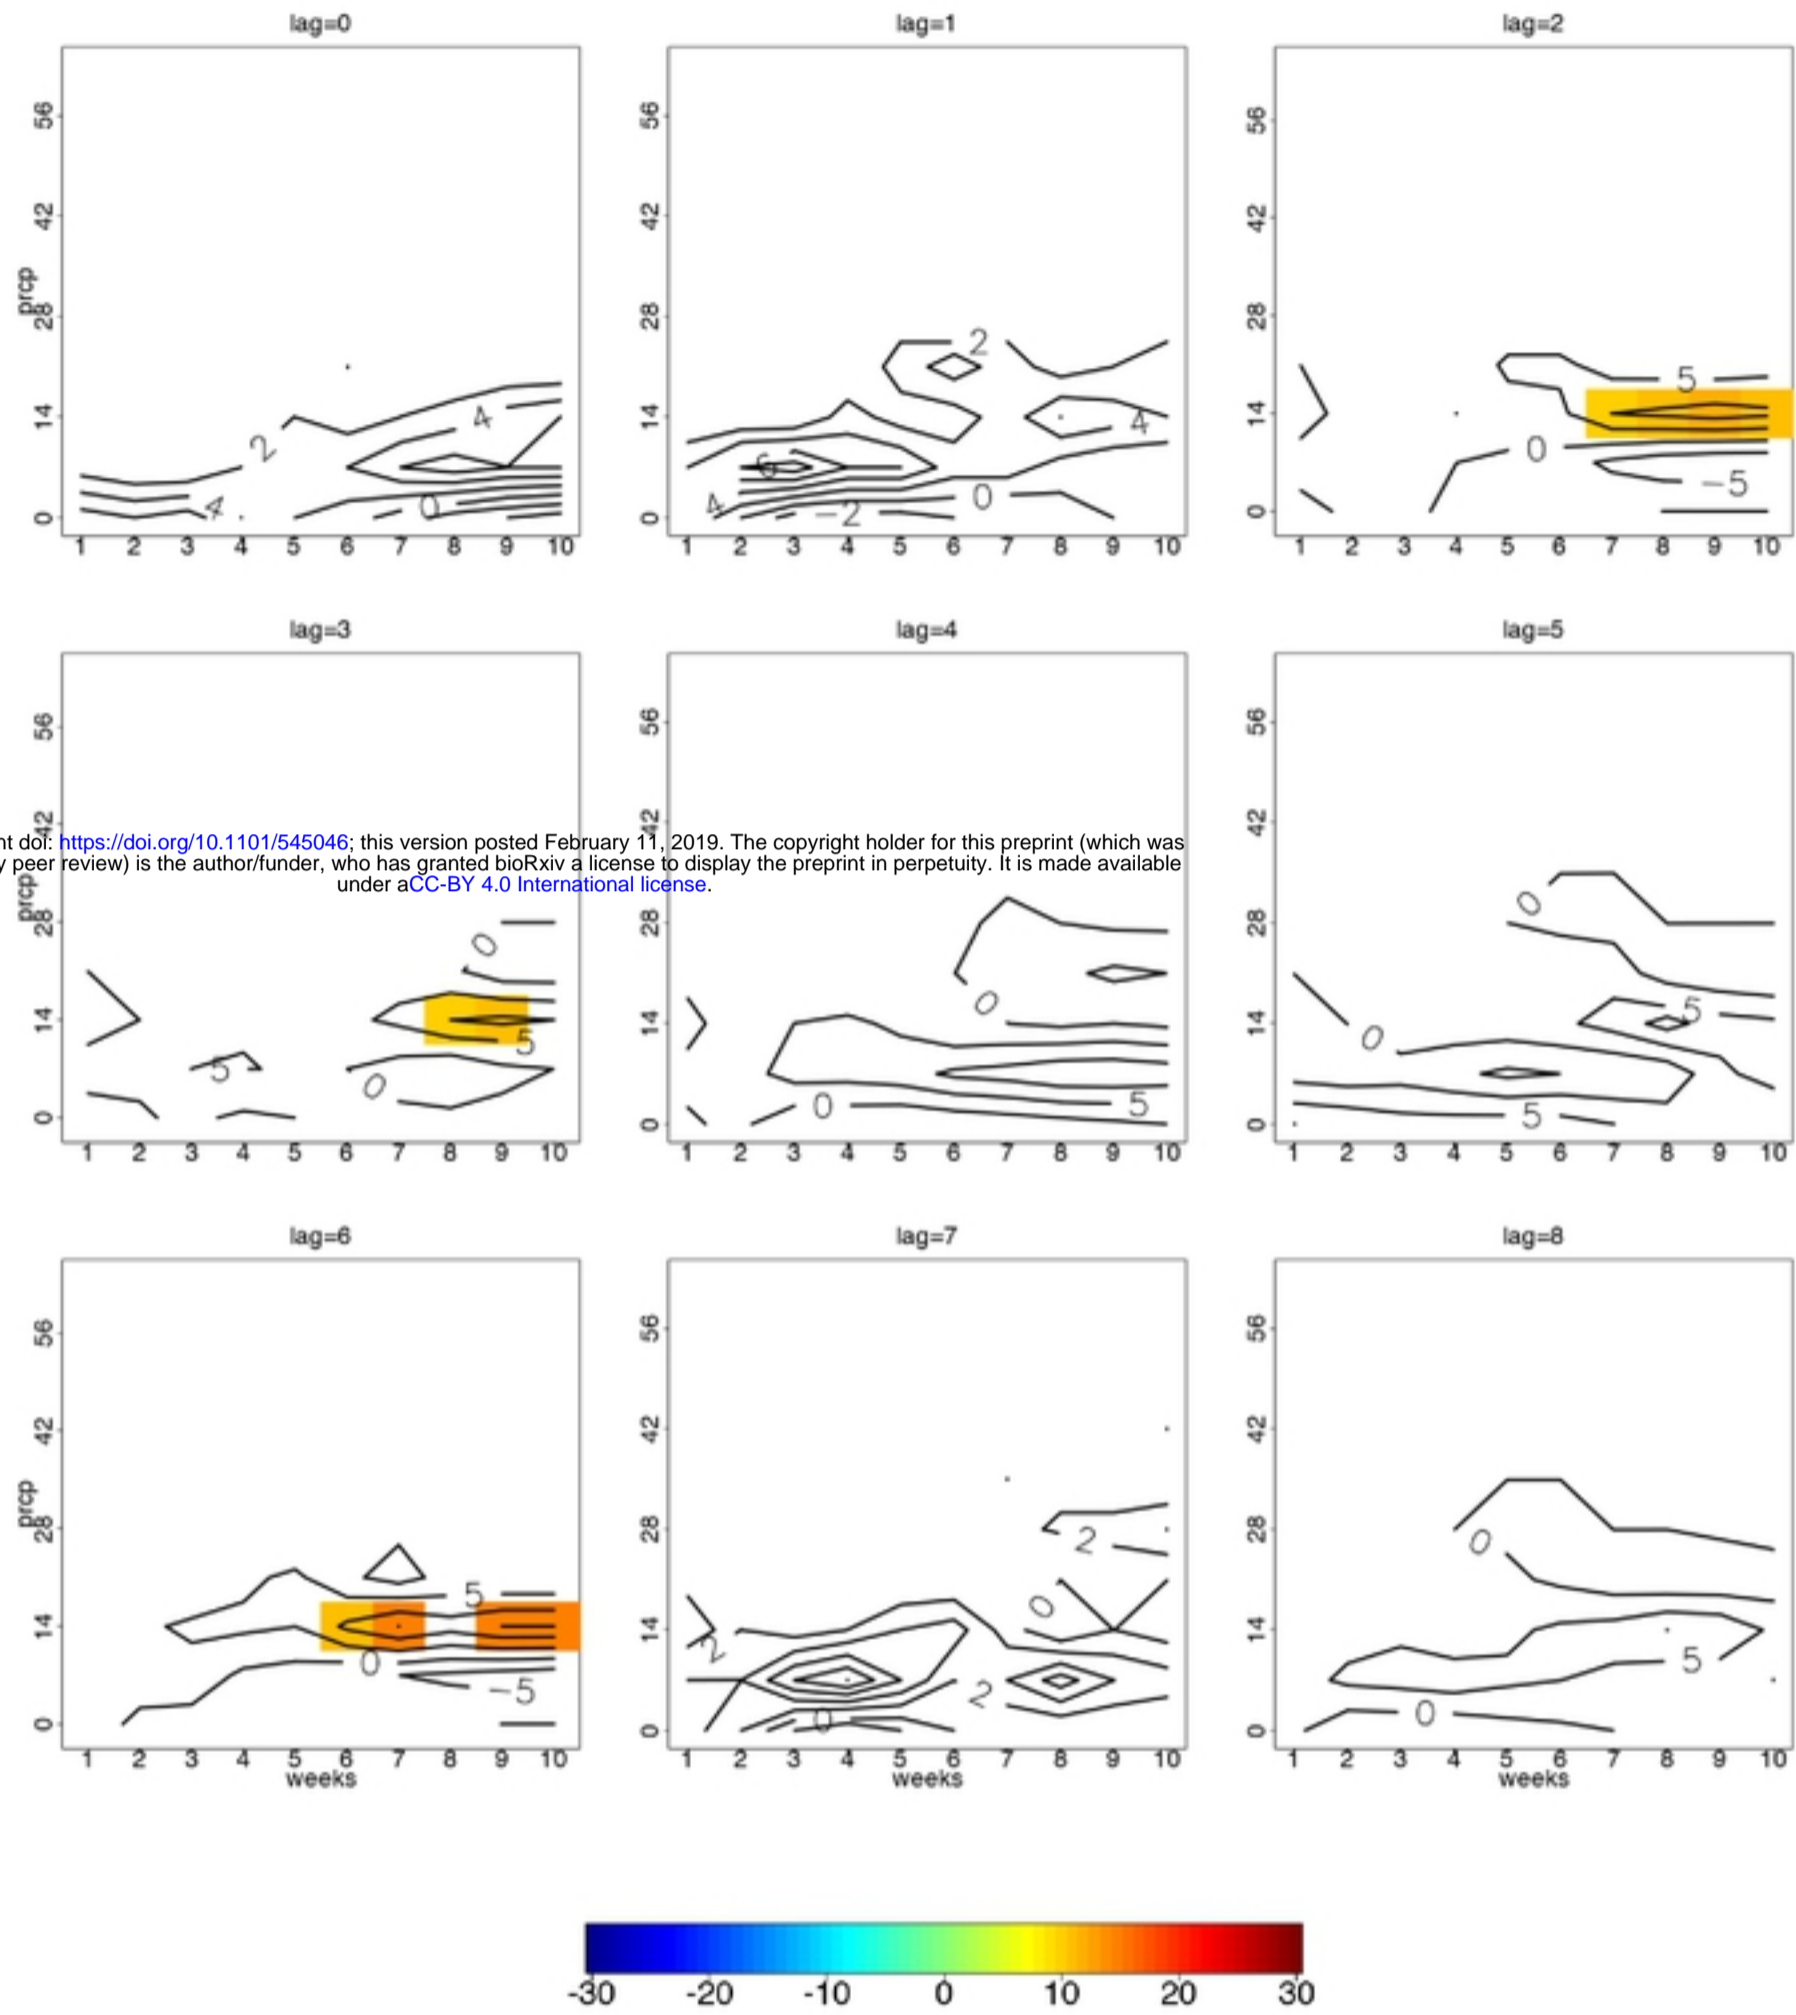

bioRxiv preprint doi: <https://doi.org/10.1101/545046>; this version posted February 11, 2019. The copyright holder for this preprint (which was not certified by peer review) is the author/funder, who has granted bioRxiv a license to display the preprint in perpetuity. It is made available under aCC-BY 4.0 International license.

Figure

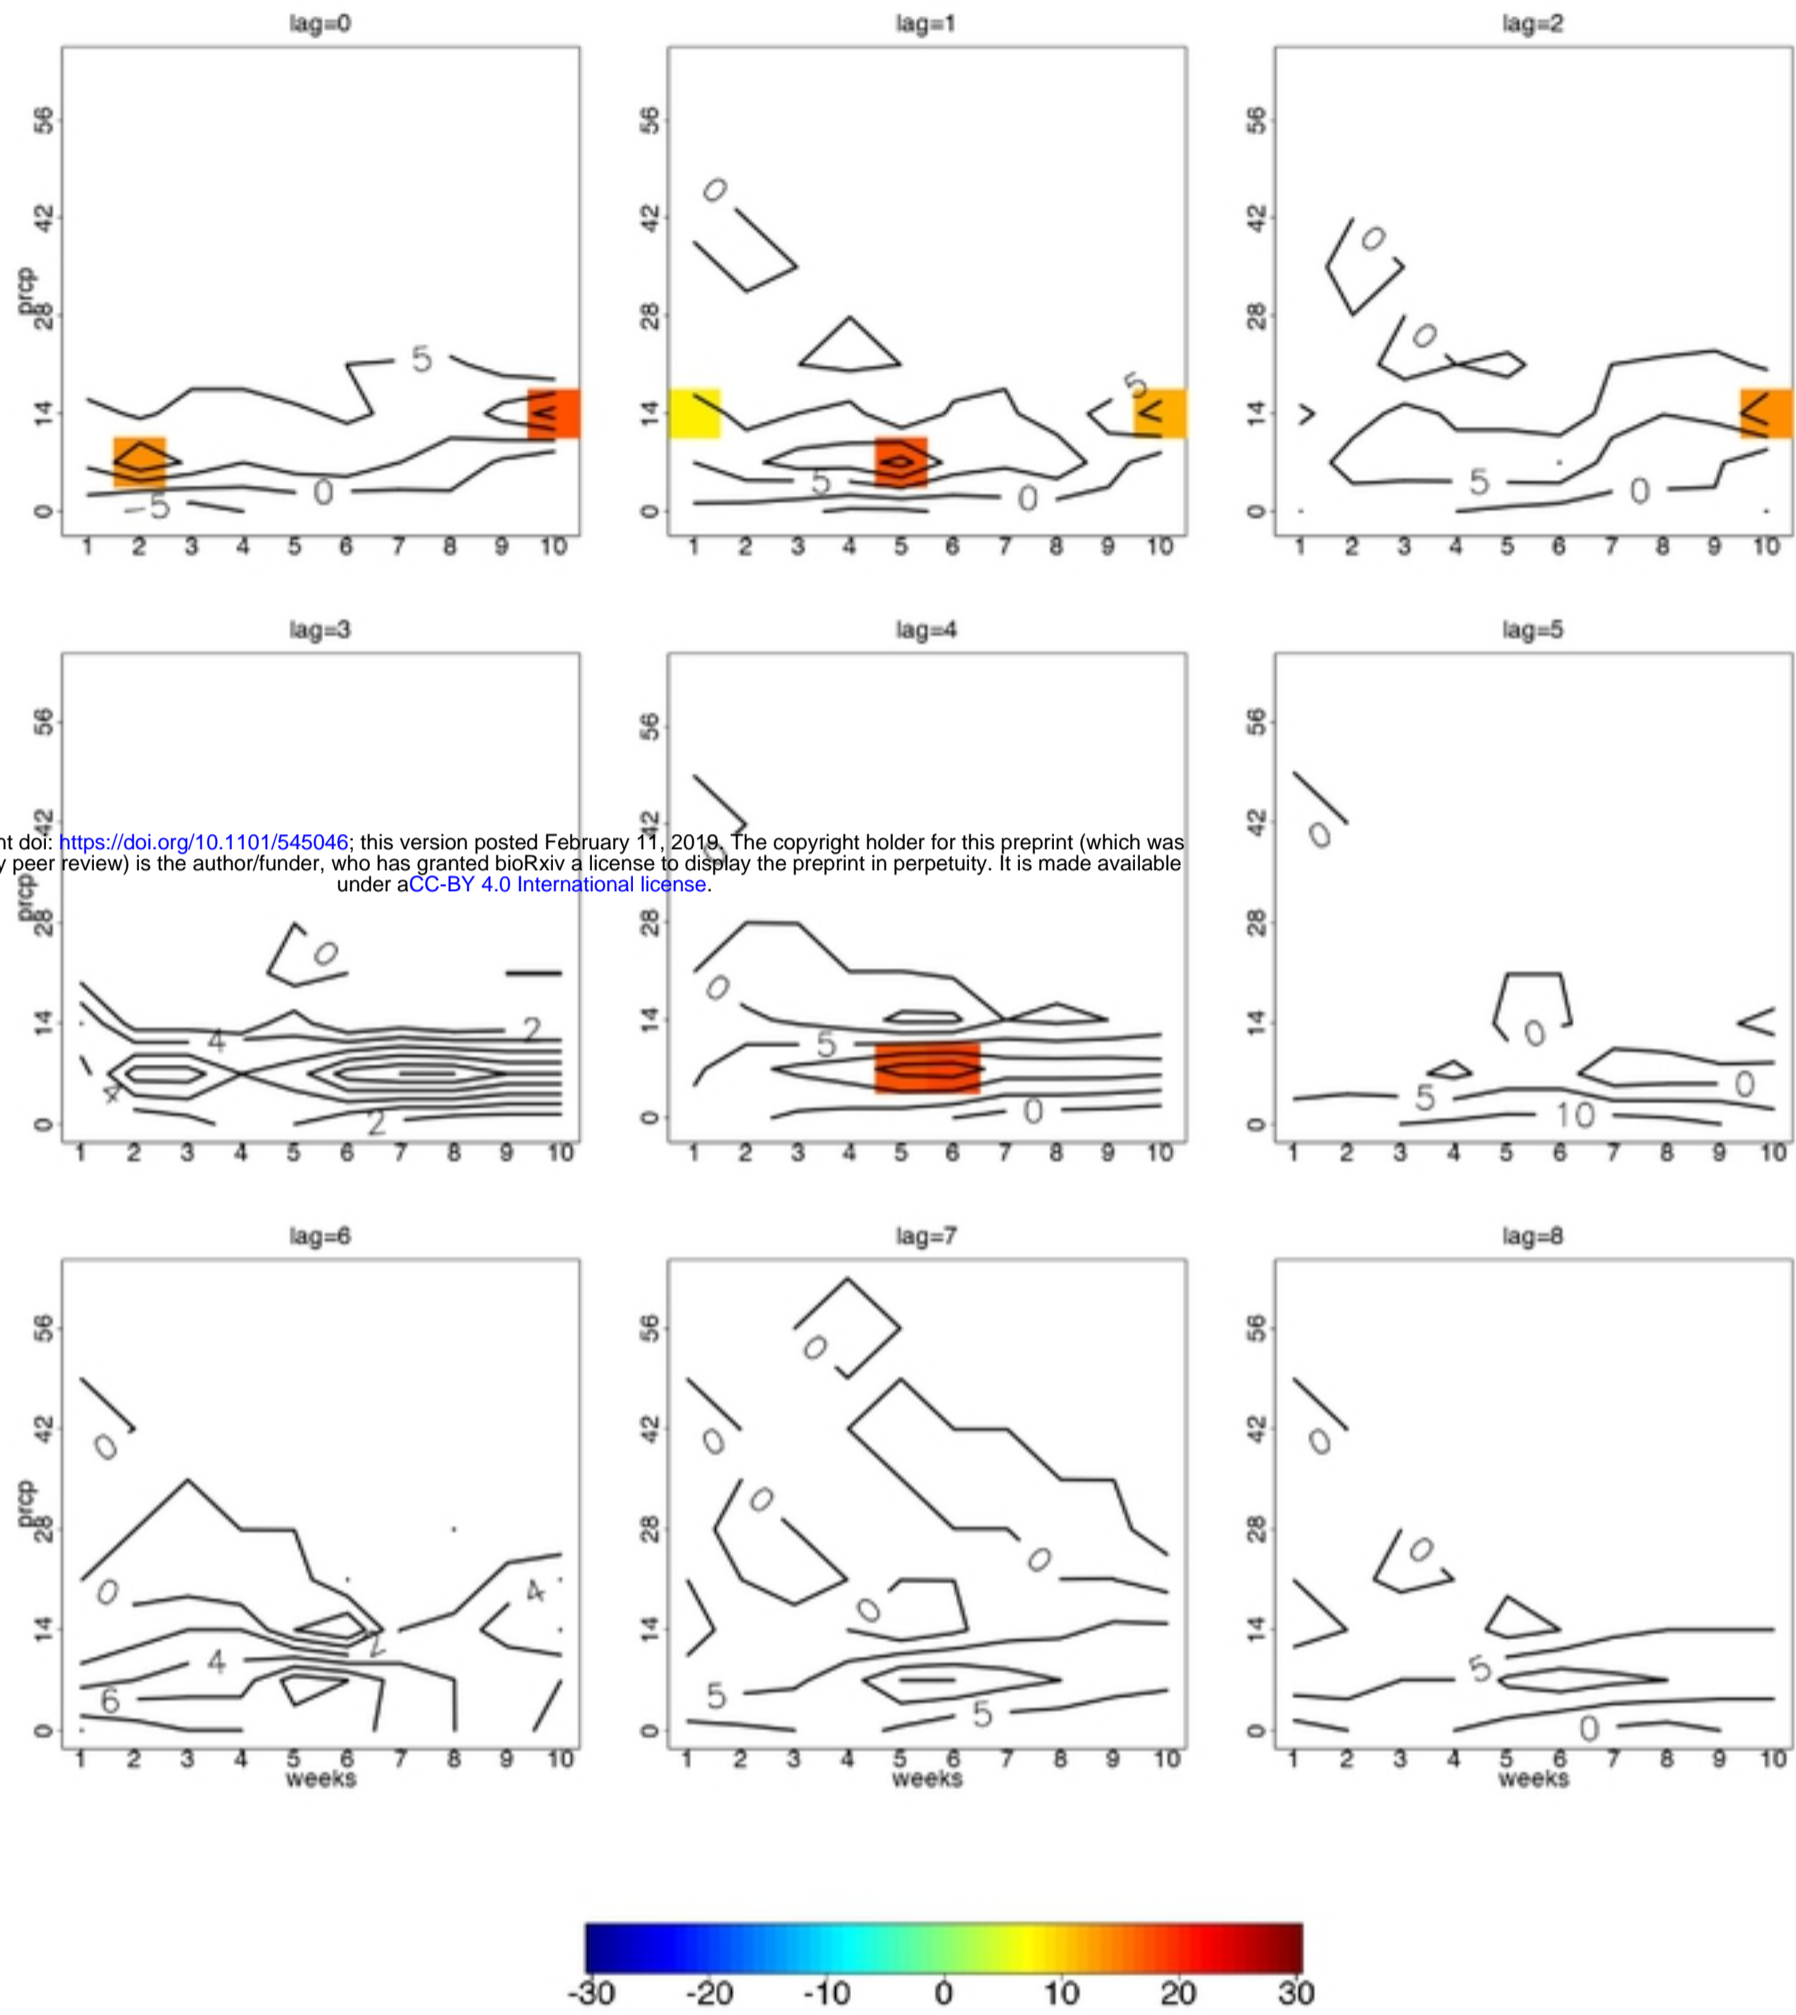

bioRxiv preprint doi: <https://doi.org/10.1101/545046>; this version posted February 11, 2019. The copyright holder for this preprint (which was not certified by peer review) is the author/funder, who has granted bioRxiv a license to display the preprint in perpetuity. It is made available under aCC-BY 4.0 International license.

Figure

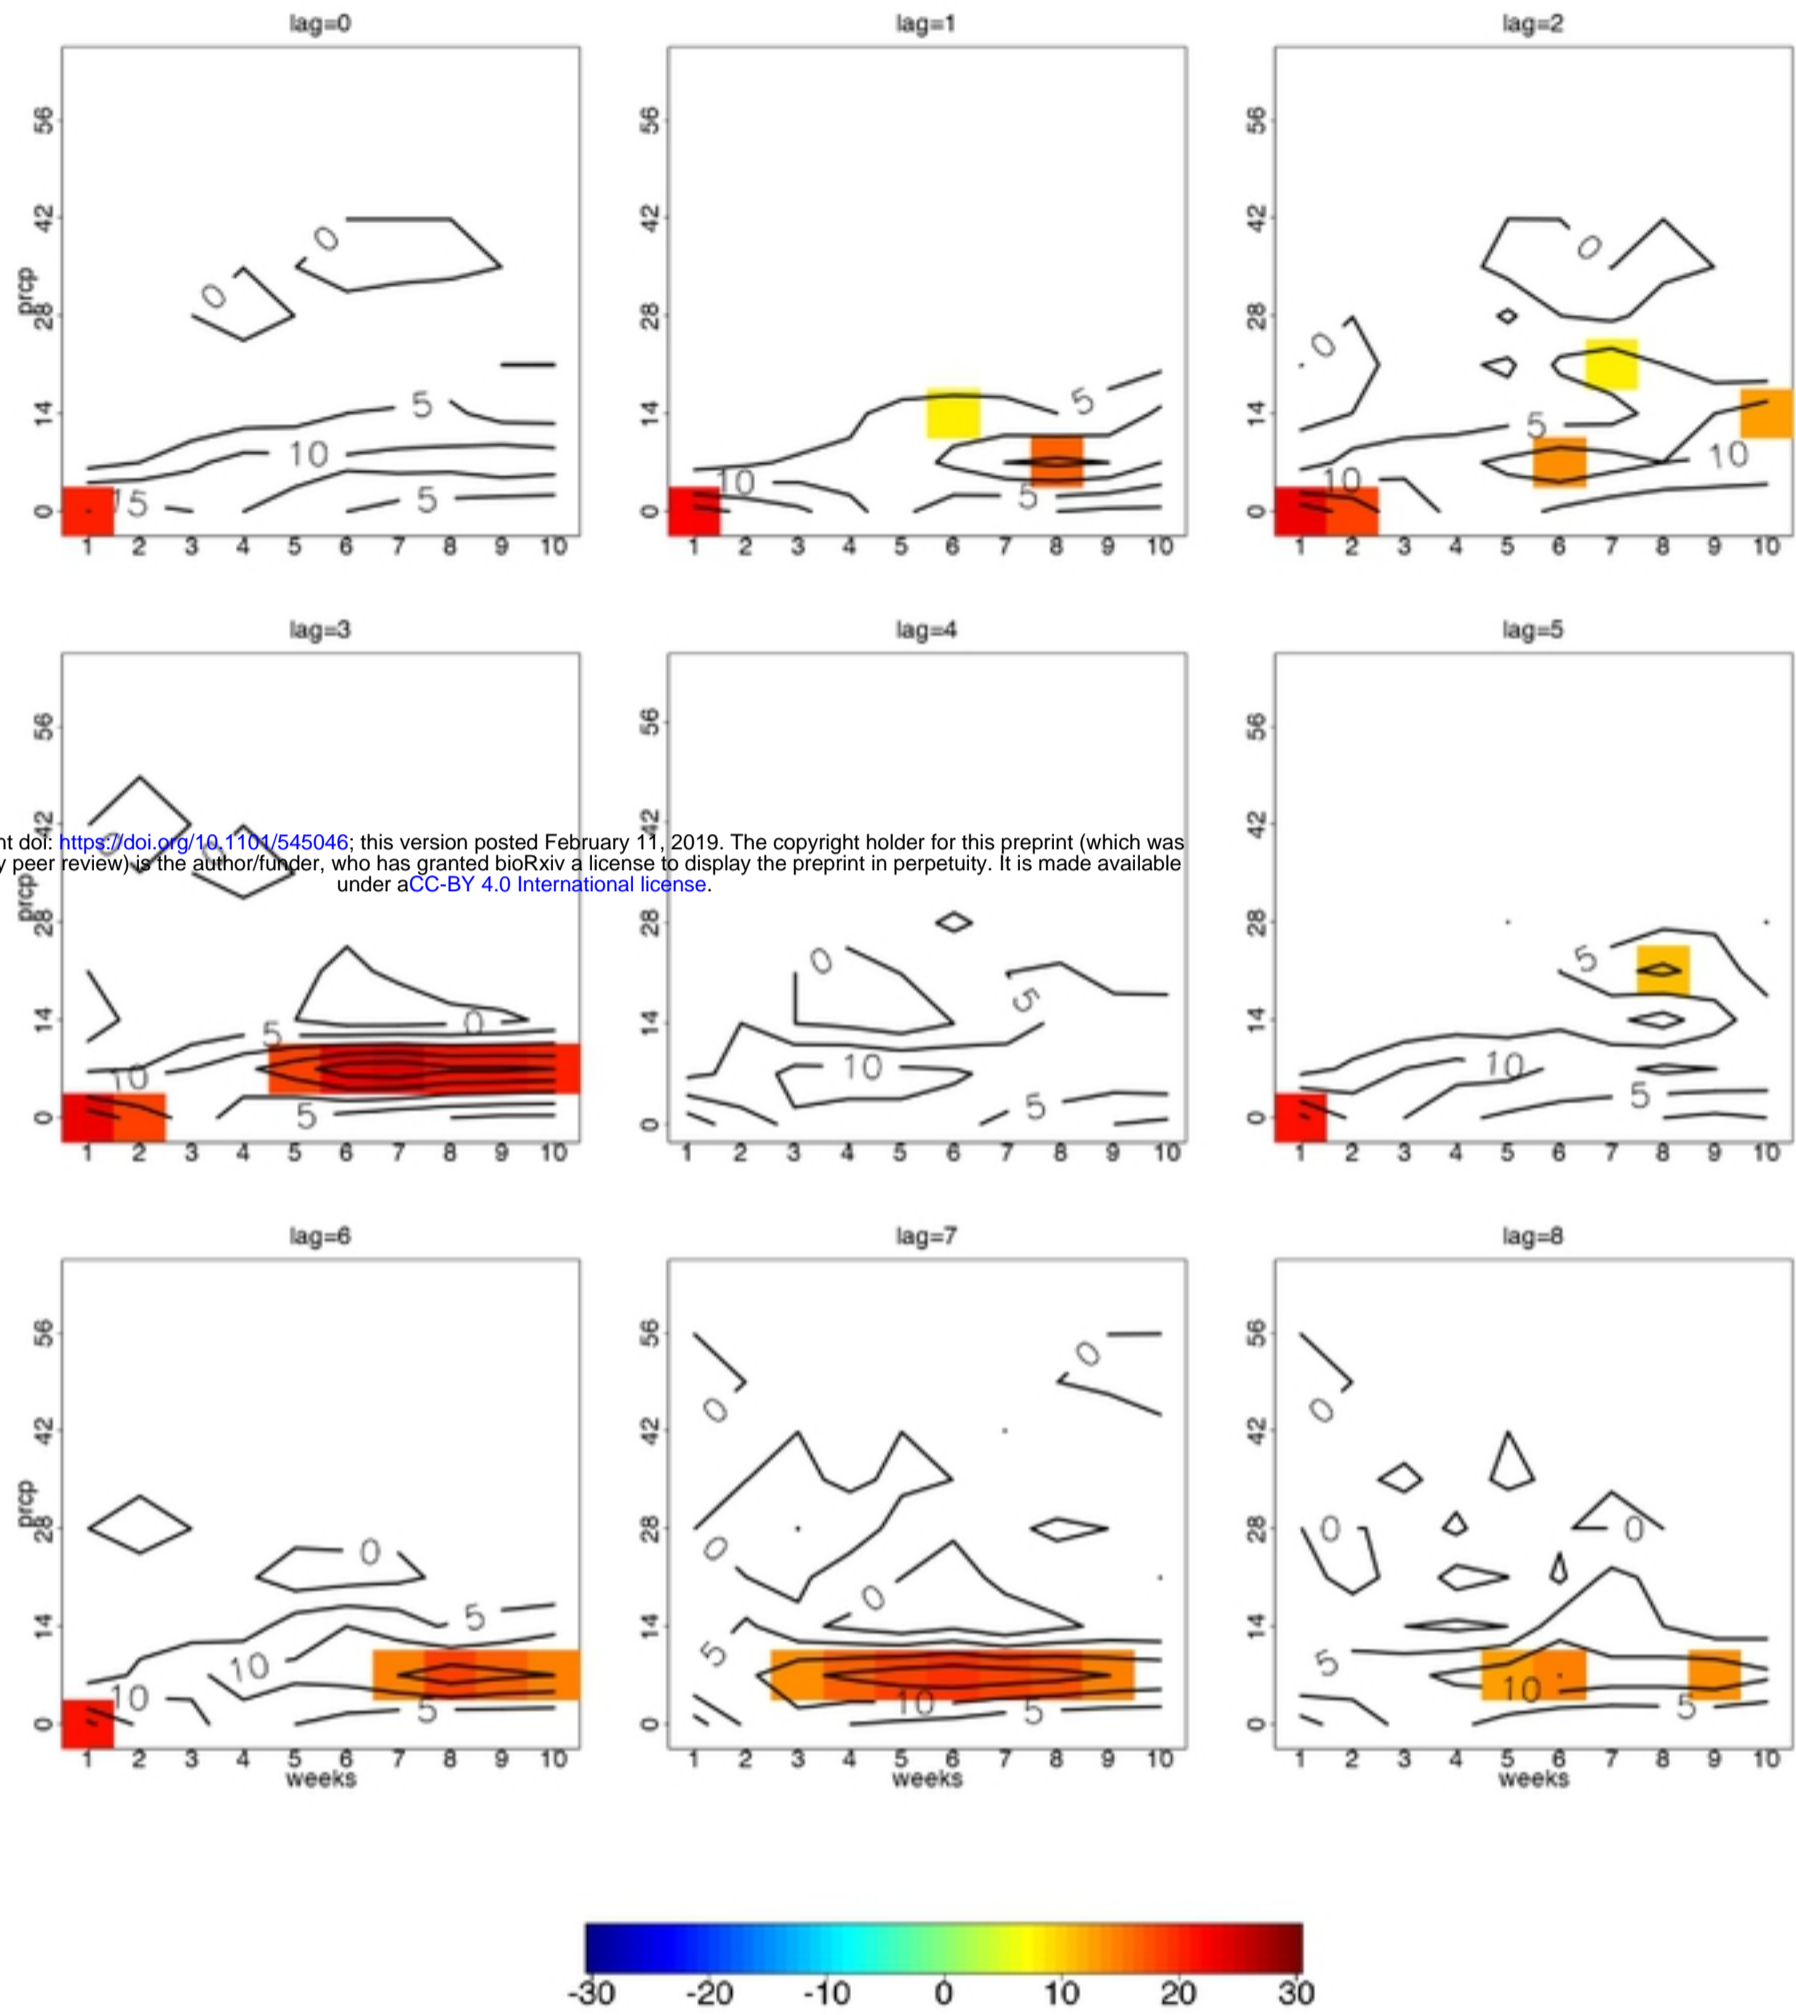

bioRxiv preprint doi: <https://doi.org/10.1101/545046>; this version posted February 11, 2019. The copyright holder for this preprint (which was not certified by peer review) is the author/funder, who has granted bioRxiv a license to display the preprint in perpetuity. It is made available under aCC-BY 4.0 International license.

Figure

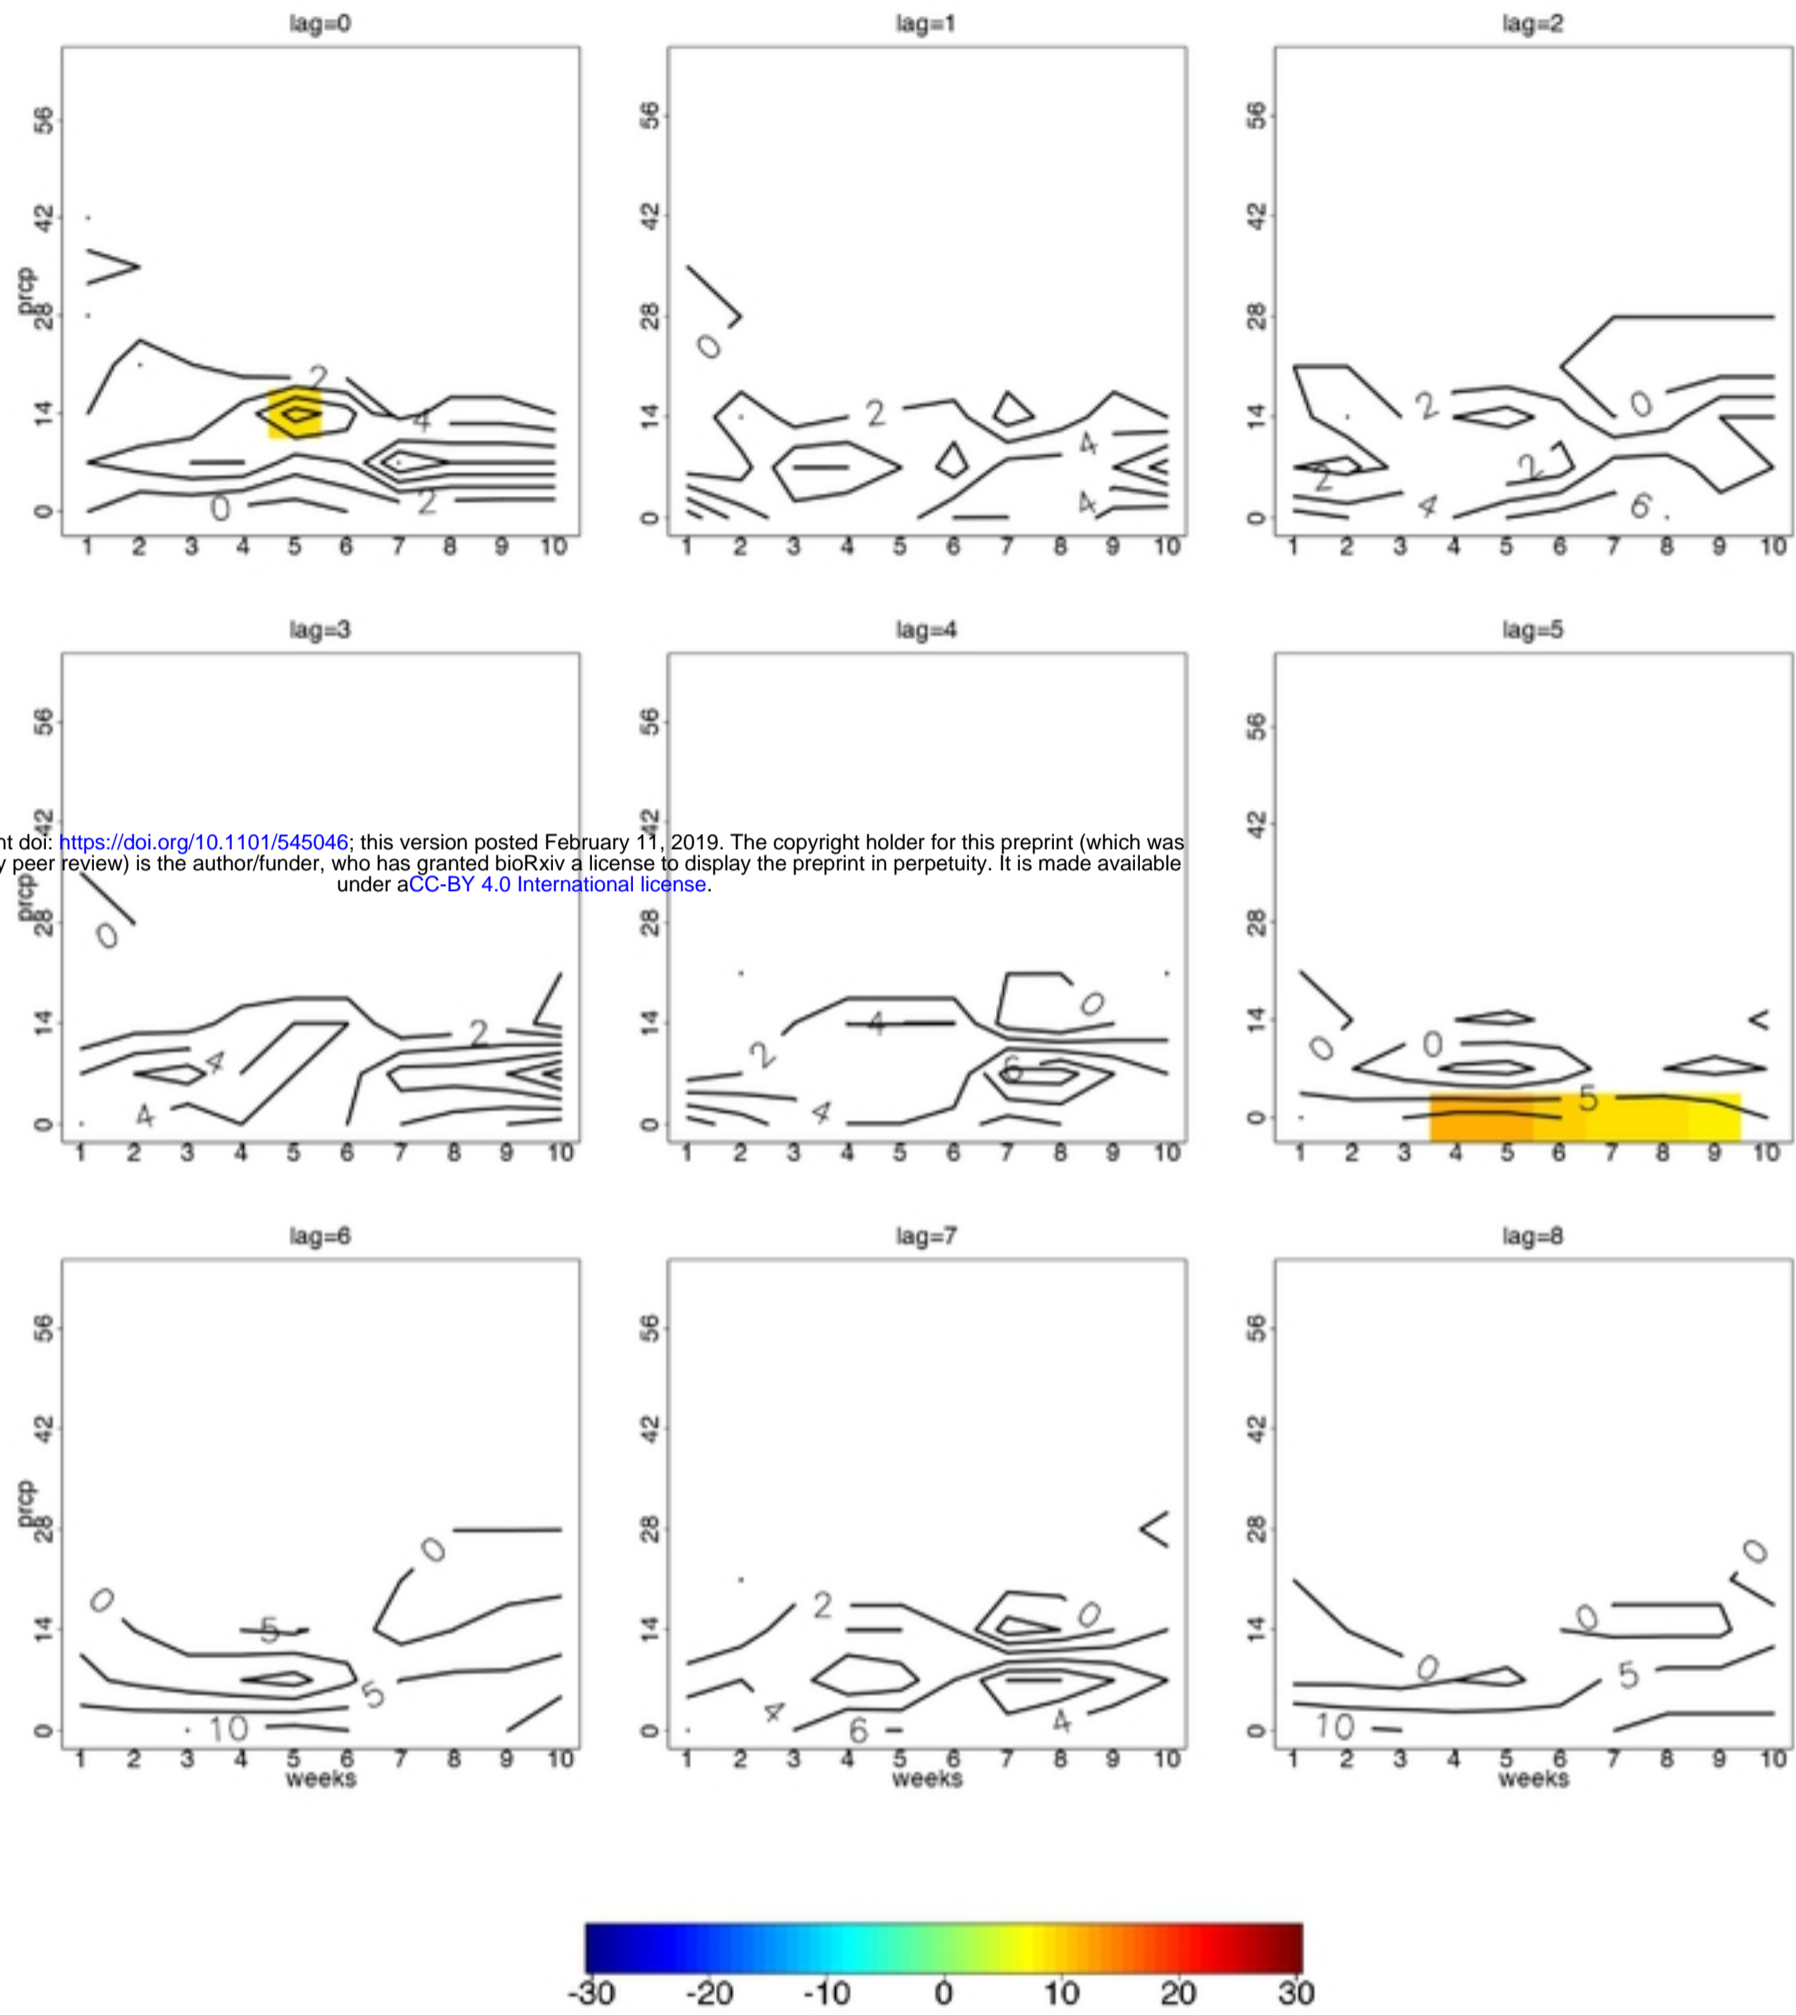

bioRxiv preprint doi: <https://doi.org/10.1101/545046>; this version posted February 11, 2019. The copyright holder for this preprint (which was not certified by peer review) is the author/funder, who has granted bioRxiv a license to display the preprint in perpetuity. It is made available under aCC-BY 4.0 International license.

Figure
